# Supplementary material
Source: PubMed Central journal article supplement (PMC5969457)
Supplement: CJN.06980717SupplementaryData1.pdf [file CJN.06980717SupplementaryData1.pdf]

## **Supplementary e-Appendix.**

| <b>Contents:</b>                                                                                                                 | <b>Page number</b> |
|----------------------------------------------------------------------------------------------------------------------------------|--------------------|
| Details of data analysis methods                                                                                                 | 2                  |
| Supplementary Tables cited in main text                                                                                          | 4                  |
| • <b>Table S1.</b> KDIGO criteria                                                                                                |                    |
| • <b>Table S2.</b> Additional Baseline Covariates                                                                                |                    |
| • <b>Table S3.</b> Control Antibiotics in the primary analysis                                                                   |                    |
| • <b>Table S4.</b> Colistin Dosing                                                                                               |                    |
| • <b>Table S5.</b> AKI incidence across control antibiotics                                                                      |                    |
| • <b>Table S6.</b> Analysis of KDIGO Stage 2 or higher: Rates and Rate Ratios                                                    |                    |
| • <b>Table S7.</b> Analysis of KDIGO Stage 2 or higher: Cumulative incidence and Risk Differences                                |                    |
| • <b>Table S8.</b> Analysis in Subgroup of Patients Free of Prior Acute Kidney Injury: Rates and Rate Ratios                     |                    |
| • <b>Table S9.</b> Analysis in Subgroup of Patients Free of Prior Acute Kidney Injury: Cumulative incidence and Risk Differences |                    |
| • <b>Table S10.</b> Outcomes in patients with Acute Kidney Injury                                                                |                    |
| Supplementary Figures cited in main text                                                                                         | 9                  |
| • <b>Figure S1.</b> Time to Acute kidney injury in the sub-group of patients without prior acute kidney injury                   |                    |
| • <b>Figure S2.</b> AKI in colistin exposed patients, stratified by colistin dose (mg/kg/day)                                    |                    |
| References                                                                                                                       | 11                 |

## **Data analysis methods supplement**

### Effect modification modeling methods

Recognizing the importance of addressing potential confounding of the interaction analyses in our paper, we chose to use covariate adjustment to reduce any potential confounding of each interaction point estimate. This involved creating separate multivariable models for each interaction, with each model applying a change-in-estimate algorithm<sup>1</sup> to adjust the interaction point estimate. The rationale for this approach is that although propensity score matching ensures balance of covariates in colistin exposed vs. unexposed patients, it may not guarantee balance within strata of a given interaction; stratum specific PS models are not feasible for continuous variable interactions, and we wanted to use the same estimation approach for all interactions of interest. In addition, there is strong precedent for combining propensity score matching with covariate adjustment in the matched population, which falls under the umbrella of doubly robust estimation.<sup>2</sup> The variables hemoglobin, chloride, age, and glomerular filtration rate were modeled as continuous covariates in the interaction analyses. The rationale for this approach is that categorization of continuous variables during analysis leads to a loss of information.<sup>3</sup> For display of the results, we solved the regression equations for various values of each factor that have clinical relevance.

### Effect modification covariate adjustment model specifications

1. Hemoglobin concentration
  - Adjusted for age, platelet count, race, admission type, anion gap, diabetes mellitus, baseline acute kidney injury status
2. Age
  - Adjusted for platelet count, sodium concentration, diabetes mellitus, heart failure, hypertension, anion gap, vancomycin exposure, angiotensin converting enzyme inhibitor / angiotensin receptor blocker exposure, immunosuppression exposure
3. Chloride concentration
  - Adjusted for age, platelet count, glomerular filtration rate, sodium concentration, anion gap, race, admission type, liver disease, hematologic malignancy
4. Glomerular Filtration Rate
  - Adjusted for platelet count, sodium concentration, diabetes mellitus, center, cardiac arrhythmia, immunosuppression exposure
5. Vasopressor exposure
  - Adjusted for platelet count, sodium concentration, center, diabetes mellitus, heart failure, anion gap
6. Statin exposure
  - Adjusted for diabetes mellitus, center, baseline acute kidney injury status, heart failure, hematologic malignancy
7. Vancomycin exposure
  - Adjusted for platelet count, sodium concentration, anion gap, race, intensive care unit admission, rheumatic disease

## 8. Aminoglycoside exposure

- Adjusted for heart failure, diabetes mellitus, anion gap

### Risk factor analysis in colistin exposed patients

We examined potential risk factors for acute kidney injury in patients exposed to colistin in the unmatched colistin group (n = 168). The unmatched (as opposed to the matched group) was used to maximize sample size and because the goal was not a comparison with controls in this analysis. Potential risk factors were first examined in univariate Poisson regression models. Candidate risk factor variables were age, race, total body weight, body mass index, intensive care unit admission, mechanical ventilation, baseline acute kidney injury, comorbidities (heart failure, hypertension, liver disease, diabetes mellitus, chronic kidney disease, myocardial infarction, peripheral vascular disease, malignancy, cystic fibrosis), vasopressor exposure, statin exposure, concomitant nephrotoxins (only drug exposures that overlapped with colistin exposure), baseline glomerular filtration rate, laboratory values (hemoglobin, sodium, chloride, bicarbonate, glucose), infecting organism, time to treatment, blood product administration, and colistin dose (mg/kg/day colistin base activity).

We then constructed a multivariable Poisson regression model for the association of each variable and acute kidney injury rate. Multivariable modeling proceeded with the variables that had a univariate association of  $p < 0.25$ .<sup>4</sup> The model was fit using a backwards selection procedure. Variables were eliminated individually by comparing the log likelihood ratio test for each model step and using the 5% significance level.<sup>4</sup> Variables eliminated were re-entered in the eventual final multivariable model to ensure that no omitted variable significantly reduced the log likelihood of the model, with a p-value of 0.1 for inclusion. The linearity of associations between continuous variables in the in final model and acute kidney injury rate were examined with fractional polynomial analysis,<sup>4</sup> with no deviations from linearity detected. Multicollinearity among the variables in the final model was checked with the variance inflation factor (VIF), which showed an average VIF of 1.07 and with no variable showing a value greater than 1.15. Lastly, the final model was checked for overdispersion with the Poisson goodness of fit test, with no evidence of overdispersion ( $p=0.50$ )

**Table S1. KDIGO criteria**

| <b>AKI level</b> | <b>Creatinine criteria</b>                                                                    |
|------------------|-----------------------------------------------------------------------------------------------|
| <b>Stage 1</b>   | ≥ 0.3 mg/dl increase within 48 hours <b>—or—</b> 1.5 - 1.9 x baseline within 7 days           |
| <b>Stage 2</b>   | 2-2.9 x baseline                                                                              |
| <b>Stage 3</b>   | 3 x baseline <b>—or—</b> increase in Scr to ≥ 4.0 mg/dl <b>—or—</b> renal replacement therapy |

### **Methods for defining pre-exposure AKI episodes**

Pre-exposure AKI was defined by applying the KDIGO criteria from hospital admission up to the time of exposure. Baseline creatinine was defined as the lowest value obtained within the first 48 hours of hospitalization. Because the impact of a prior AKI episode on future AKI risk during antibiotic treatment might depend on the timing of, and resolution of the prior episode, we further determined whether a prior AKI episode was resolved at the time of antibiotic exposure. We defined resolution as a return of creatinine concentration to within 25% of the baseline value. As stated in the primary text, patients that required renal replacement therapy within 14 days prior to the index date were excluded. The final pre-exposure AKI variable was thus coded as follows: No prior AKI, prior AKI that resolved, prior AKI that was unresolved (i.e. active AKI at the time of antibiotic exposure). As detailed in the primary text, we conducted supplementary analyses that were restricted to patients without any prior AKI episodes.

**Table S2. Additional Baseline Covariates**

| Variable                             | Unmatched Cohort  |                   |                                         | Matched Cohort    |                  |                                         |
|--------------------------------------|-------------------|-------------------|-----------------------------------------|-------------------|------------------|-----------------------------------------|
|                                      | Colistin<br>n=168 | Control<br>n=1222 | Standardized<br>Difference <sup>e</sup> | Colistin<br>n=150 | Control<br>n=150 | Standardized<br>Difference <sup>e</sup> |
| <b>Comorbidities, n (%)</b>          |                   |                   |                                         |                   |                  |                                         |
| Myocardial infarction                | 27 (16)           | 219 (18)          | -0.05                                   | 26 (17)           | 26 (17)          | 0                                       |
| Cardiac arrhythmias                  | 96 (57)           | 680 (56)          | 0.03                                    | 88 (59)           | 89 (59)          | -0.01                                   |
| Valvular disease                     | 24 (14)           | 217 (18)          | -0.1                                    | 23 (15)           | 22 (15)          | 0.02                                    |
| Peripheral vascular disease          | 30 (18)           | 241 (20)          | -0.05                                   | 27 (18)           | 29 (19)          | -0.03                                   |
| Cerebrovascular disease              | 36 (21)           | 280 (23)          | -0.03                                   | 30 (20)           | 28 (19)          | 0.03                                    |
| Pulmonary circulation disorder       | 38 (23)           | 282 (23)          | -0.01                                   | 34 (23)           | 30 (20)          | 0.06                                    |
| Rheumatic disease                    | 10 (6)            | 53 (4)            | 0.07                                    | 7 (5)             | 7 (5)            | 0                                       |
| Peptic ulcer disease                 | 12 (7)            | 77 (6)            | 0.03                                    | 11 (7)            | 11 (7)           | 0                                       |
| Hemiplegia / paraplegia              | 25 (15)           | 169 (14)          | 0.03                                    | 24 (16)           | 24 (16)          | 0                                       |
| Solid tumor malignancy               |                   |                   |                                         |                   |                  |                                         |
| Non-metastatic                       | 12 (7)            | 141 (12)          | -0.15                                   | 11 (7)            | 13 (9)           | -0.05                                   |
| Metastatic                           | 10 (6)            | 117 (10)          | -0.14                                   | 10 (7)            | 9 (6)            | 0.03                                    |
| Hematologic malignancy               | 12 (7)            | 111 (9)           | -0.07                                   | 12 (8)            | 8 (5)            | 0.11                                    |
| AIDS/HIV                             | 4 (2)             | 24 (2)            | 0.03                                    | 3 (2)             | 3 (2)            | 0                                       |
| Dementia                             | 7 (4)             | 57 (5)            | -0.02                                   | 7 (5)             | 5 (3)            | 0.06                                    |
| Cystic Fibrosis                      | 16 (9)            | 84 (7)            | 0.1                                     | 14 (9)            | 17 (11)          | -0.07                                   |
| Transplant <sup>a</sup>              | 8 (5)             | 61 (5)            | -0.01                                   | 8 (5)             | 6 (4)            | 0.06                                    |
| <b>Medications, n (%)</b>            |                   |                   |                                         |                   |                  |                                         |
| Anti-VRE <sup>b</sup>                | 28 (17)           | 47 (4)            | 0.43                                    | 20 (13)           | 26 (17)          | -0.11                                   |
| Amphotericin                         | 1 (0.6)           | 2 (0.2)           | 0.07                                    | 0 (0)             | 0 (0)            | na                                      |
| Other antifungals <sup>c</sup>       | 46 (27)           | 159 (13)          | 0.36                                    | 39 (26)           | 42 (28)          | -0.05                                   |
| Aspirin                              | 39 (23)           | 336 (28)          | -0.1                                    | 34 (23)           | 31 (21)          | 0.05                                    |
| Statins                              | 40 (24)           | 284 (23)          | 0.01                                    | 36 (24)           | 35 (23)          | 0.02                                    |
| Corticosteroids                      | 43 (26)           | 238 (19)          | 0.14                                    | 38 (25)           | 34 (23)          | 0.06                                    |
| Other immunosuppression <sup>d</sup> | 13 (8)            | 80 (7)            | 0.05                                    | 12 (8)            | 11 (7)           | 0.03                                    |

Supplemental material is neither peer-reviewed nor thoroughly edited by CJASN. The authors alone are responsible for the accuracy and presentation of the material.

|                                          |            |            |       |            |            |       |
|------------------------------------------|------------|------------|-------|------------|------------|-------|
| Parenteral Nutrition                     | 37 (22)    | 159 (13)   | 0.24  | 31 (21)    | 29 (19)    | 0.03  |
| Intravenous antiarrhythmics <sup>e</sup> | 7 (4)      | 31 (3)     | 0.09  | 5 (3)      | 4 (3)      | 0.04  |
| <b>Laboratory</b>                        |            |            |       |            |            |       |
| Sodium, mEq/L, mean (SD)                 | 139 (6.5)  | 138 (5.0)  | 0.19  | 139 (5.4)  | 139 (4.8)  | 0.05  |
| Chloride, mEq/L, mean (SD)               | 106 (7.6)  | 104 (6.9)  | 0.14  | 105 (7.4)  | 105 (7.2)  | 0.05  |
| Potassium, mEq/L, mean (SD)              | 4.1 (0.5)  | 4.1 (0.6)  | 0.11  | 4.1 (0.5)  | 4.1 (0.6)  | 0.03  |
| Bicarbonate, mEq/L, mean (SD)            | 25.9 (6.0) | 26.3 (5.2) | -0.07 | 26.3 (5.8) | 26.5 (5.7) | -0.04 |
| Anion gap, mEq/L, mean (SD)              | 12.1 (4.1) | 11.8 (3.2) | 0.09  | 11.9 (3.6) | 11.8 (3.7) | 0.04  |
| Glucose, mg/dL, mean (SD)                | 139 (50.4) | 140 (59)   | -0.03 | 139 (52)   | 135 (44)   | 0.07  |
| <b>Prior hospital visits, n (%)</b>      |            |            |       |            |            |       |
| None                                     | 50 (30)    | 358 (29.3) | 0.01  | 43 (29)    | 44 (29)    | -0.01 |
| One to three                             | 57 (34)    | 463 (38)   | -0.08 | 51 (34)    | 48 (32)    | 0.04  |
| More than three                          | 61 (36)    | 401 (33)   | 0.07  | 56 (37)    | 58 (39)    | -0.03 |

**Notes:** a- Transplant types include liver, lung, and heart; b- linezolid or daptomycin; c- fluconazole, voriconazole, or caspofungin; d- mycophenolate, methotrexate, any type of chemotherapy, azathioprine, or sirolimus; e- Standardized differences are a measure of covariate balance that are not effected by sample size. Values larger than 0.10 are considered evidence of meaningful imbalance. **Abbreviations-** med-median; IQR- interquartile range; AIDS- acquired immunodeficiency syndrome; HIV- human immunodeficiency virus; VRE- vancomycin resistant enterococcus; Difference between groups refers to the standardized difference.

**Table S3.** Control Antibiotics in the primary analysis

| Antibiotic              | Unmatched Cohort | Matched Cohort |
|-------------------------|------------------|----------------|
|                         | Frequency (%)    | Frequency (%)  |
| Cefepime                | 491 (40)         | 50 (33)        |
| Levofloxacin            | 308 (25)         | 43 (29)        |
| Meropenem               | 220 (18)         | 25 (17)        |
| Piperacillin/tazobactam | 95 (8)           | 6 (4)          |
| Aztreonam               | 54 (5)           | 8 (5)          |
| Ceftazidime             | 29 (2)           | 6 (4)          |
| Ampicillin/sulbactam    | 25 (2)           | 12 (8)         |

**Table S4.** AKI incidence across control antibiotics

| Antibiotic              | AKI incidence, n (%) |
|-------------------------|----------------------|
| Cefepime                | 13/50 (26)           |
| Levofloxacin            | 7/43 (16)            |
| Meropenem               | 7/25 (28)            |
| Piperacillin/tazobactam | 1/6 (17)             |

Supplemental material is neither peer-reviewed nor thoroughly edited by CJASN. The authors alone are responsible for the accuracy and presentation of the material.

|                      |           |
|----------------------|-----------|
| Aztreonam            | 1/8 (13)  |
| Ceftazidime          | 1/6 (17)  |
| Ampicillin/sulbactam | 3/12 (25) |

p = 0.901 for the difference across groups (Fisher's exact test)

**Table S5. Colistin Dosing**

|                                 | Dosing Frequency                 |                                   |                                   |
|---------------------------------|----------------------------------|-----------------------------------|-----------------------------------|
|                                 | Every 8 hours<br>n=46, med (IQR) | Every 12 hours<br>n=88, med (IQR) | Every 24 hours<br>n=16, med (IQR) |
| GFR, mL/min/1.73 m <sup>2</sup> | 101 (78, 124)                    | 86 (62, 118)                      | 29 (27, 47)                       |
| Colistin dose                   |                                  |                                   |                                   |
| million IU/day <sup>a</sup>     | 10.9 (9.0, 13.3)                 | 9.9 (6.7, 11.7)                   | 4.7 (3.7, 6.7)                    |
| mg/day                          | 326 (270, 400)                   | 295 (200, 350)                    | 141 (110, 200)                    |
| mg/kg/day <sup>b</sup>          | 4.9 (4.3, 5.4)                   | 4.5 (3.5, 5.4)                    | 2.4 (1.9, 3.1)                    |

a- 1,000,000 IU is equivalent to approximately 30 mg colistin base activity; b-Normalized to ideal body weight; med- median; IQR- interquartile range; IU-international units

**Table S6. Analysis of KDIGO Stage 2 or higher: Rates and Rate Ratios**

| Outcome             | Colistin<br>n (rate/100 days) | Control<br>n (rate/100 days) | IRR<br>(95% CI) |
|---------------------|-------------------------------|------------------------------|-----------------|
| Acute kidney injury |                               |                              |                 |
| End of follow up    | 47 (4.0)                      | 15 (1.1)                     | 3.7 (2.1-6.7)   |
| 72 hours            | 19 (4.5)                      | 6 (1.4)                      | 3.2 (1.3-8.0)   |

Analysis included 150 matched pairs. IRR- incidence rate ratio; CI- confidence interval

**Table S7. Analysis of KDIGO Stage 2 or higher: Cumulative incidence and Risk Differences**

| Outcome             | Colistin<br>n (%) | Control<br>n (%) | Risk Difference*<br>(95% CI) |
|---------------------|-------------------|------------------|------------------------------|
| Acute kidney injury |                   |                  |                              |
| End of follow up    | 47 (31)           | 15 (10)          | 21 (13-30)                   |
| 72 hours            | 19 (13)           | 6 (4)            | 9 (2-15)                     |

Analysis included 150 matched pairs. \*risk difference expressed as percentage; CI- confidence interval

**Table S8. Analysis in Subgroup of Patients Free of Prior Acute Kidney Injury: Rates and Rate Ratios**

| Outcome             | Colistin<br>n (rate/100 days) | Control<br>n (rate/100 days) | IRR<br>(95% CI) |
|---------------------|-------------------------------|------------------------------|-----------------|
| Acute kidney injury |                               |                              |                 |
| End of follow up    | 57 (9.1)                      | 14 (1.6)                     | 5.7 (3.1-10.4)  |
| 72 hours            | 23 (8.6)                      | 6 (2.1)                      | 4.1 (1.7-10.2)  |

Analysis included 101 matched pairs IRR- incidence rate ratio; CI- confidence interval

Supplemental material is neither peer-reviewed nor thoroughly edited by CJASN. The authors alone are responsible for the accuracy and presentation of the material.

**Table S9.** Analysis in Subgroup of Patients Free of Prior Acute Kidney Injury: Cumulative incidence and Risk Differences

| <b>Outcome</b>      | <b>Colistin<br/>n (%)</b> | <b>Control<br/>n (%)</b> | <b>Risk Difference*<br/>(95% CI)</b> |
|---------------------|---------------------------|--------------------------|--------------------------------------|
| Acute kidney injury |                           |                          |                                      |
| End of follow up    | 57 (56)                   | 14 (14)                  | 43 (31-54)                           |
| 72 hours            | 23 (23)                   | 6 (6)                    | 17 (7-26)                            |

Analysis included 101 matched pairs; \*risk difference expressed as percentage; CI- confidence interval

**Table S10.** Outcomes in patients with Acute Kidney Injury<sup>a</sup>

| <b>Outcome</b>        | <b>Colistin<br/>n=77 AKI cases</b> | <b>Control<br/>n=33 AKI cases</b> | <b>Difference (95%CI)</b> |
|-----------------------|------------------------------------|-----------------------------------|---------------------------|
| AKI resolution        | 34 (44%)                           | 19 (58%)                          | -13.5 (-33.6, 6.7)        |
| Survival to discharge | 30/34 (88%)                        | 17/19 (89%)                       | -1 (-18.7, 16.3)          |
| Persistent AKI        | 43 (56%)                           | 14 (42%)                          | 13.5 (-6.7, 33.6)         |
| Survival to discharge | 23/43 (53%)                        | 9/14 (64%)                        | -10.8 (-39.9, 18.4)       |

a- survival was higher in patients with AKI recovery in both groups: colistin (88% vs. 53%, p=0.001); control (89% vs. 42%, p=0.08).



Supplemental material is neither peer-reviewed nor thoroughly edited by CJASN. The authors alone are responsible for the accuracy and presentation of the material.

**Figure S.1.** Time to Acute kidney injury in the sub-group of patients without prior acute kidney injury

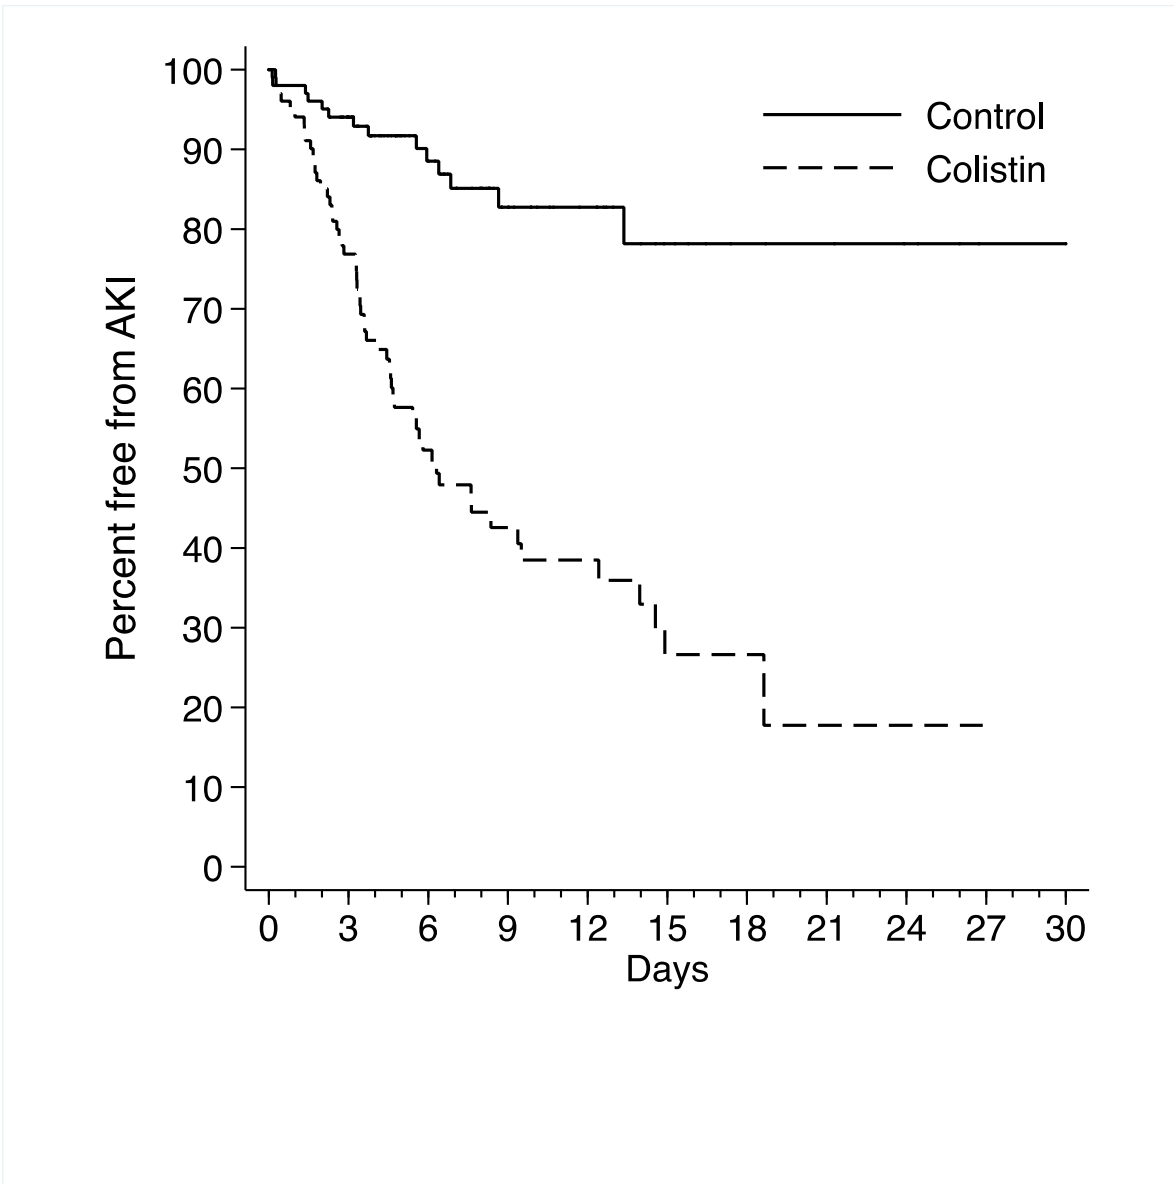

**Figure S2.** AKI in colistin exposed patients, stratified by colistin dose (mg/kg/day)

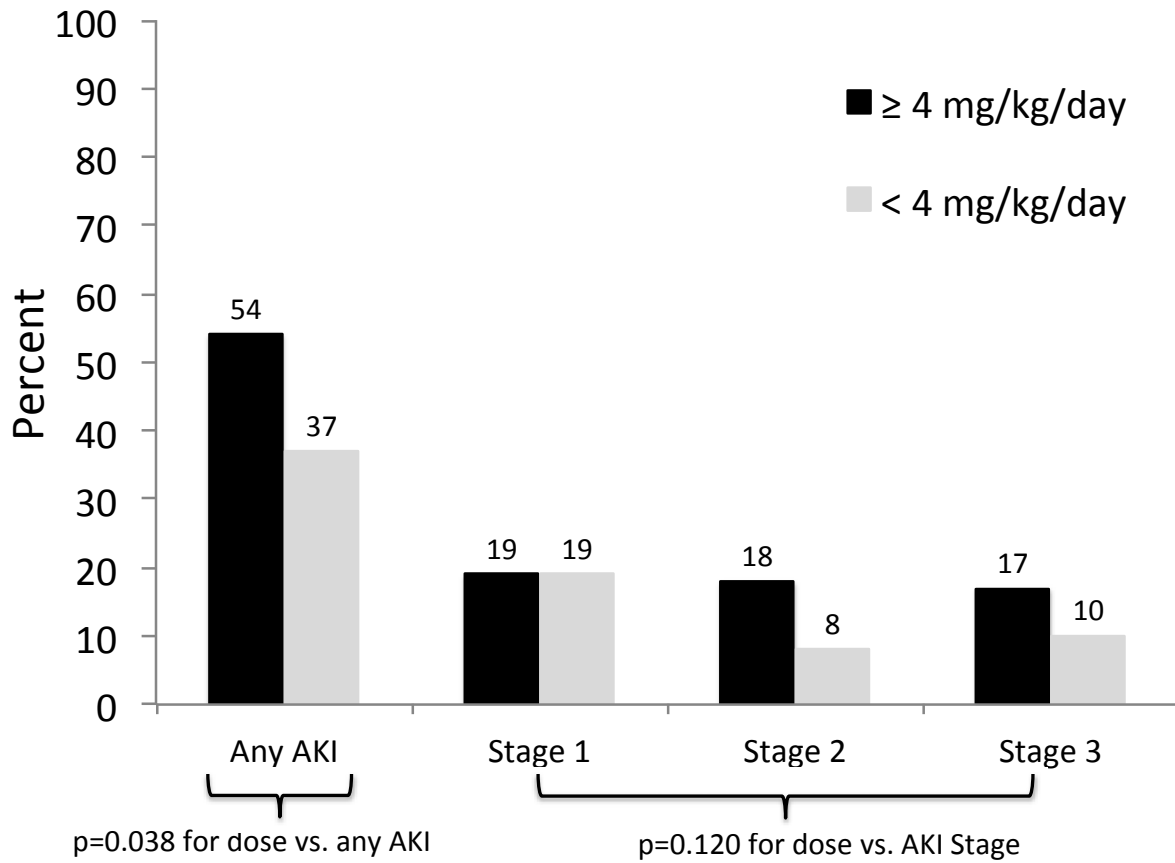

*Supplemental material is neither peer-reviewed nor thoroughly edited by CJASN. The authors alone are responsible for the accuracy and presentation of the material.*

**References:**

1. Maldonado G, Greenland S. Simulation study of confounder-selection strategies. *Am J Epidemiol.* 1993; 138: 923–936
2. McCaffrey DF, Griffin BA, Almirall D, Slaughter ME, Ramchand R, Burgette LF. A tutorial on propensity score estimation for multiple treatments using generalized boosted models. *Stat Med.* 2013 Aug 30;32(19):3388-414
3. Greenland S. Avoiding power loss associated with categorization and ordinal scores in dose-response and trend analysis. *Epidemiology.* 1995 Jul;6(4):450-4.
4. Hosmer DW, Lemeshow S. *Applied Logistic Regression.* 2nd edition. New York: Wiley Inter-Science, 2000.
