# Supplementary material
Source: PubMed Central journal article supplement (PMC5969457)
Supplement: CJN.06980717SupplementaryData2.pdf [file CJN.06980717SupplementaryData2.pdf]

Todd A. Miano,<sup>1</sup> Ebbing Lautenbach,<sup>2</sup> F. Perry Wilson,<sup>3</sup> Wensheng Guo,<sup>4</sup> Yuliya Borovskiy,<sup>5</sup> and Sean Hennessy<sup>1</sup>

<sup>1</sup>Center for Pharmacoepidemiology Research and Training, Center for Clinical Epidemiology and Biostatistics, Department of Biostatistics, Epidemiology and Informatics, Perelman School of Medicine at the University of Pennsylvania, Philadelphia, Pennsylvania;

<sup>2</sup>Division of Infectious Diseases, Department of Medicine, Center for Clinical Epidemiology and Biostatistics, Perelman School of Medicine at the University of Pennsylvania, Philadelphia, Pennsylvania;

<sup>3</sup>Division of Nephrology, Department of Internal Medicine, Program of Applied Translational Research, Yale University School of Medicine, New Haven, Connecticut, University of Pennsylvania Health System, Philadelphia, Pennsylvania;

<sup>4</sup>Center for Clinical Epidemiology and Biostatistics, Department of Biostatistics, Epidemiology and Informatics, Perelman School of Medicine at the University of Pennsylvania, Philadelphia, Pennsylvania; and

<sup>5</sup>Department of Information Services, University of Pennsylvania Health System, Philadelphia, Pennsylvania
